# Supplementary material
Source: Springer Nature journal article supplement (https://www.springermedizin.de/resource/supplementary/12974_2010_322_MOESM1_ESM.pdf/9601272)

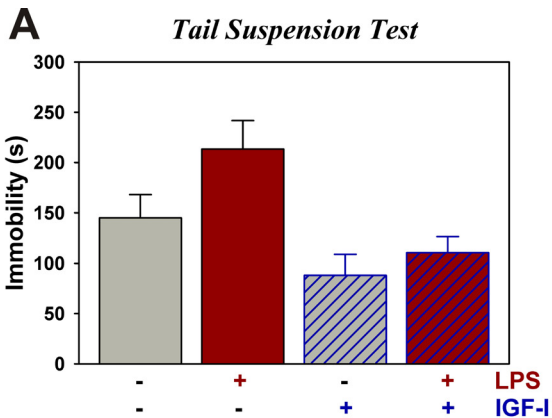

Main effects of LPS and IGF-I,  $p < 0.05$

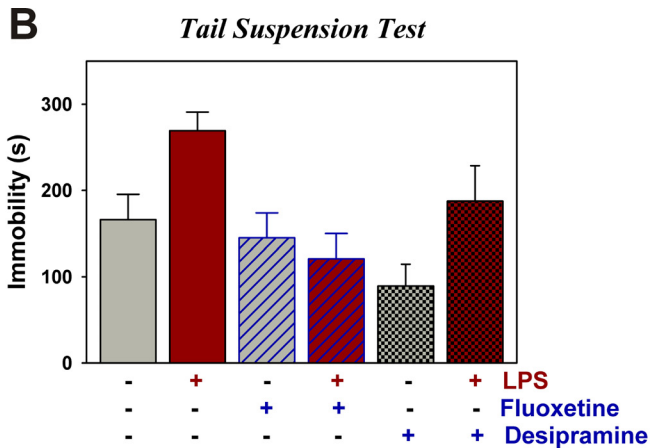

Main effects of LPS and anti-depressants,  $p < 0.05$

Supplement: MOESM1 [file 9601272]
